# Supplementary material
Source: Springer Nature journal article supplement (https://www.springermedizin.de/resource/supplementary/12967_2008_335_MOESM7_ESM.pdf/9576250)

(A)

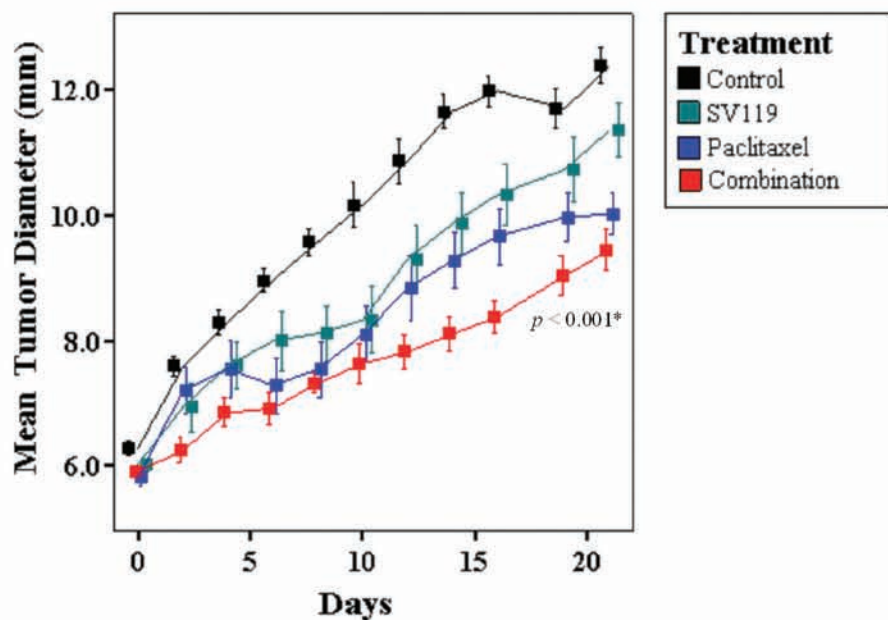

(B)

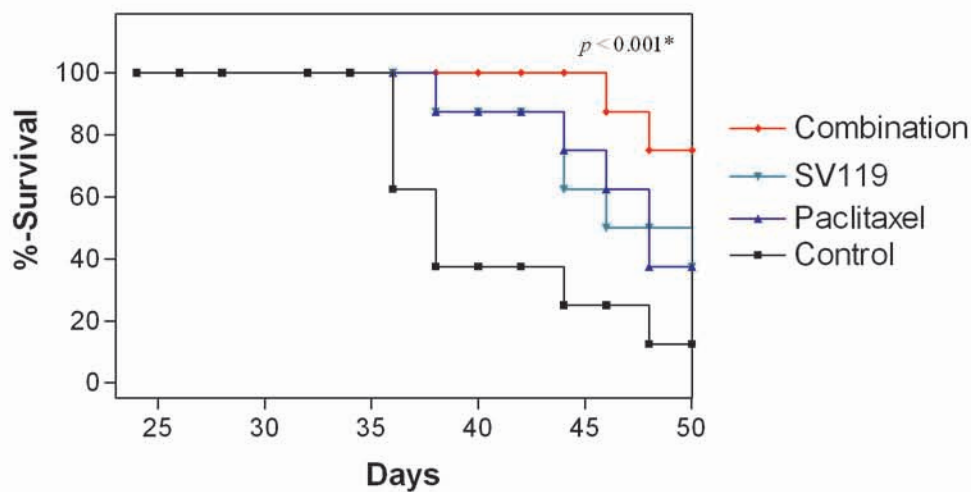

Supplement: MOESM7 [file 9576250]
